# Supplementary material for: RNA Helicase DDX1 Converts RNA G-Quadruplex Structures into R-Loops to Promote IgH Class Switch Recombination
Source: PubMed Central journal article supplement — Mol Cell. 2018 May 17;70(4):650–662.e8. doi: 10.1016/j.molcel.2018.04.001 (PMC5971202; doi:10.1016/j.molcel.2018.04.001), 2018-05-17
Supplement: mmc1.pdf [file mmc1.pdf]

**Molecular Cell, Volume 70**

**Supplemental Information**

**RNA Helicase DDX1 Converts RNA**

**G-Quadruplex Structures into R-Loops**

**to Promote *IgH* Class Switch Recombination**

**Claudia Ribeiro de Almeida, Somdutta Dhir, Ashish Dhir, Amin E. Moghaddam, Quentin Sattentau, Anton Meinhart, and Nicholas J. Proudfoot**

## Supplemental Information

### **RNA helicase DDX1 converts RNA G-quadruplex structures into R-loops to promote *IgH* Class Switch Recombination**

Claudia Ribeiro de Almeida<sup>1\*</sup>, Somdutta Dhir<sup>1</sup>, Ashish Dhir<sup>1</sup>, Amin E. Moghaddam<sup>1</sup>, Quentin Sattentau<sup>1</sup>, Anton Meinhart<sup>2</sup>, Nicholas J. Proudfoot<sup>1,3\*</sup>

<sup>1</sup>Sir William Dunn School of Pathology, University of Oxford, South Parks Road, OX1 3RE Oxford, United Kingdom

<sup>2</sup>Department of Biomolecular Mechanisms, Max-Planck-Institute for Medical Research, Jahnstrasse 29, 69120 Heidelberg, Germany

<sup>3</sup>Lead contact

\*Correspondence:

claudia.ribeirodealmeida@path.ox.ac.uk or nicholas.proudfoot@path.ox.ac.uk

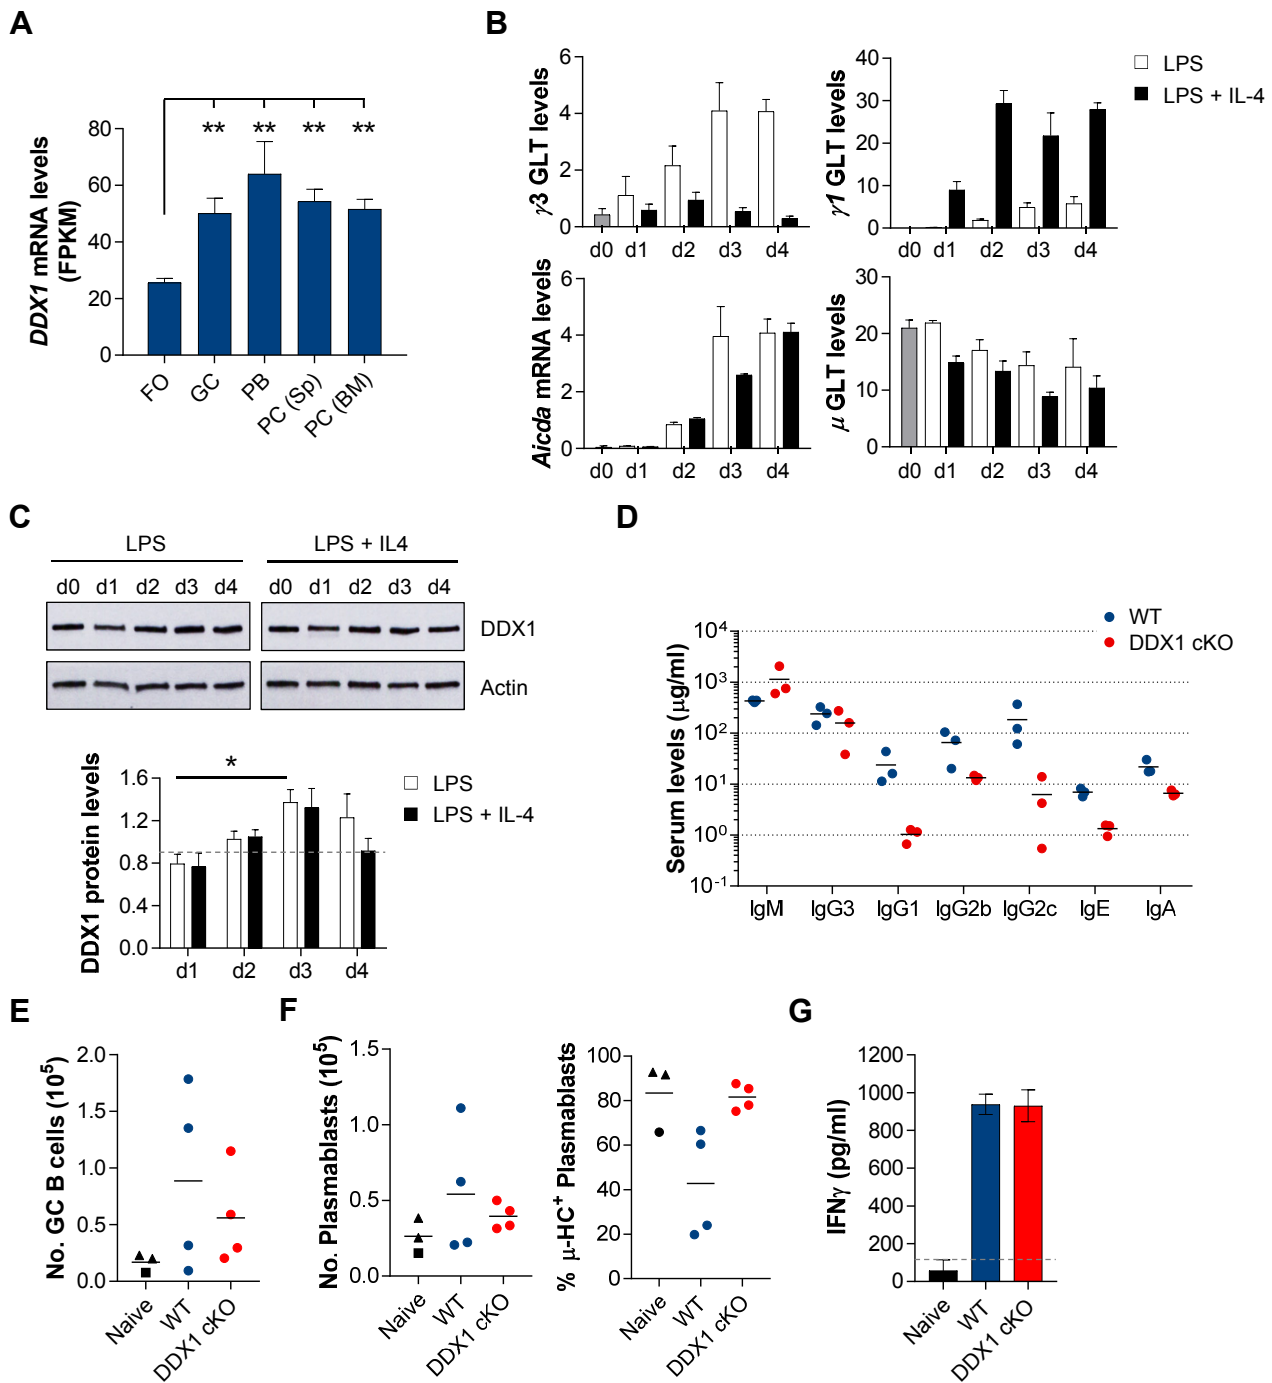

**Figure S1. Related to Figure 1.** (A) *DDX1* mRNA levels in mature B cell subsets: naïve follicular (FO) B cells, germinal centre (GC) B cells, plasmablasts (PB) and plasma cells (PC) either from spleen (Sp) or bone-marrow (BM). Expression levels (FPKM, mean  $\pm$  SD) were obtained from published RNA-Seq datasets (Brazao et al., 2016). (B) Quantitative PCR analysis of  $\gamma 3$  GLT,  $\gamma 1$  GLT,  $\mu$  GLT and *Aicda* mRNA levels in total RNA from splenic B cells stimulated with LPS or LPS plus IL-4 for 1-4 days or unstimulated cells (day 0). Values were normalized to  $\beta$ -actin mRNA levels (n=3, mean  $\pm$  SD). (C) Western blot in WT B cells stimulated with LPS or LPS plus IL-4 for 1-4 days. DDX1 protein levels from 3 replicates were normalized to Actin loading control and set to 1 in unstimulated B cells (dashed line). (D-G) Mice were immunized with ovalbumin (OVA) antigen emulsified in complete Freund's adjuvant and boosted 4 weeks after. (D) Serum Ig concentrations in WT and *DDX1* cKO mice at week 2 post-immunization. (E-F) Flow cytometric analysis in WT and *DDX1* cKO mouse spleens at week 2 post-immunization. (E) Numbers of germinal centre B cells per spleen identified as CD19<sup>+</sup>CD95<sup>+</sup>PNA<sup>+</sup> cells. (F) Numbers of plasmablasts per spleen identified as B220<sup>low</sup>CD19<sup>+</sup>CD138<sup>+</sup> cells. The percentage of non-switched plasmablasts (identified as positive for intracellular  $\mu$ -heavy-chain ( $\mu$ -HC) expression) is shown on the right. Each symbol represents individual mice and small horizontal lines indicate the mean. Naïve (non-immunized) WT (square) and *DDX1* cKO (triangles) mice were used as controls. (G) *In vitro* recall responses of splenocytes from WT and *DDX1* cKO mice at week 10 post-immunization (2-3 mice, mean  $\pm$  SD). Splenocytes were stimulated *in vitro* with ovalbumin antigen and IFN $\gamma$  concentration was determined by ELISA in the supernatant. Levels of secreted IFN $\gamma$  in cultures from naïve (non-immunized) mice are shown as a negative control. The dashed line represents average levels of secreted IFN $\gamma$  in cultures without ovalbumin antigen.

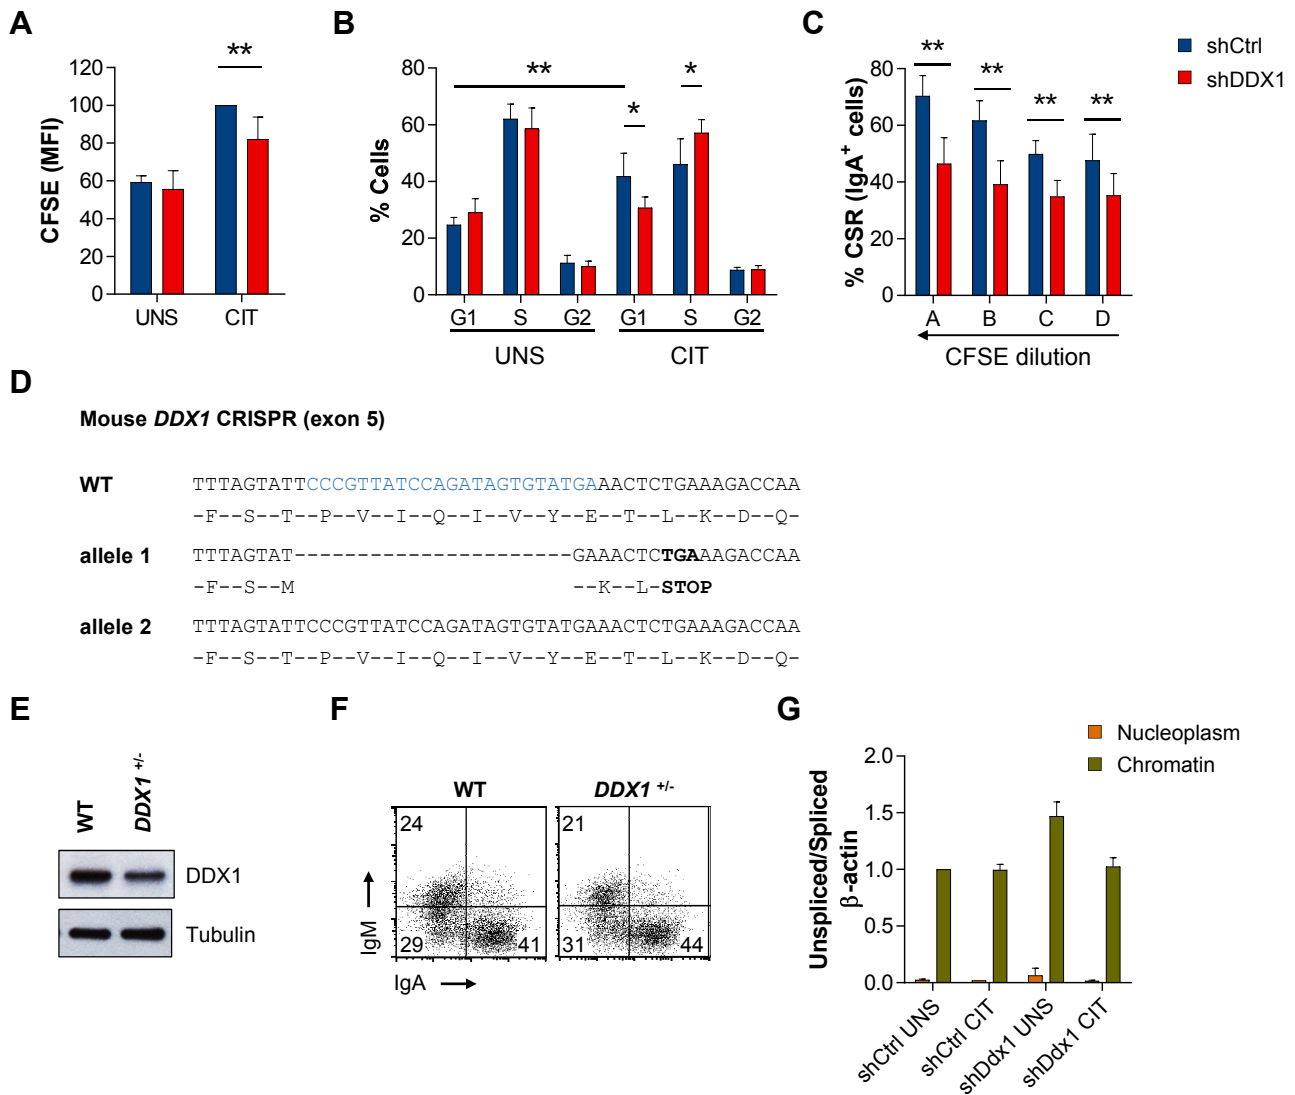

**Figure S2. Related to Figure 2.** (A-C) CH12 cells transduced with shCtrl or shDDX1 were cultured for 72 hr in unstimulated (UNS) or CIT stimulated conditions. (A) Proliferation analysis measured as dilution of the cell-tracking dye CFSE mean fluorescence intensity (MFI) by flow cytometry (values were normalized to shCtrl CIT;  $n > 3$ , mean  $\pm$  SD). (B) Percentage of cells in different cell-cycle stages analysed using BrdU and PI staining and flow cytometry ( $n \geq 3$ , mean  $\pm$  SD). (C) Quantification of CSR as a function of cell proliferation. Cells were divided into approximate quartile gates on the basis of CFSE dilution (A – high CFSE, low proliferation; D - low CFSE, high proliferation) and the percentage of IgA<sup>+</sup> cells in each gate is shown for CIT cultures ( $n \geq 3$ , mean  $\pm$  SD). (D-F) CRISPR/Cas9-mediated targeting of mouse *DDX1* in CH12 cells. (D) Genomic sequence of mouse *DDX1* exon 5 alleles in *DDX1*<sup>+/-</sup> CH12 cell line are depicted below the WT sequence (guide RNA sequence highlighted in blue); corresponding protein sequences are also shown. Allele 1 shows a 22 bp deletion that creates a frameshift mutation leading to a premature stop codon. Allele 2 contains the WT sequence. (E) Western blot for DDX1 and Tubulin loading control, in *DDX1*<sup>+/-</sup> and parental (WT) CH12 cell lines. (F) Flow cytometric analysis for surface expression of IgM and IgA in *DDX1*<sup>+/-</sup> and WT CH12 cell lines cultured in UNS and CIT stimulated conditions for 72 hr. (G) Quantitative PCR analysis of chromatin and nucleoplasm fractions of nuclear RNA from shCtrl or shDDX1 CH12 cells after 24 hr in UNS or CIT stimulated conditions. Unspliced over spliced  $\beta$ -actin gene expression levels are shown (values were normalized to chromatin fraction shCtrl UNS;  $n = 2$ , mean  $\pm$  SD).

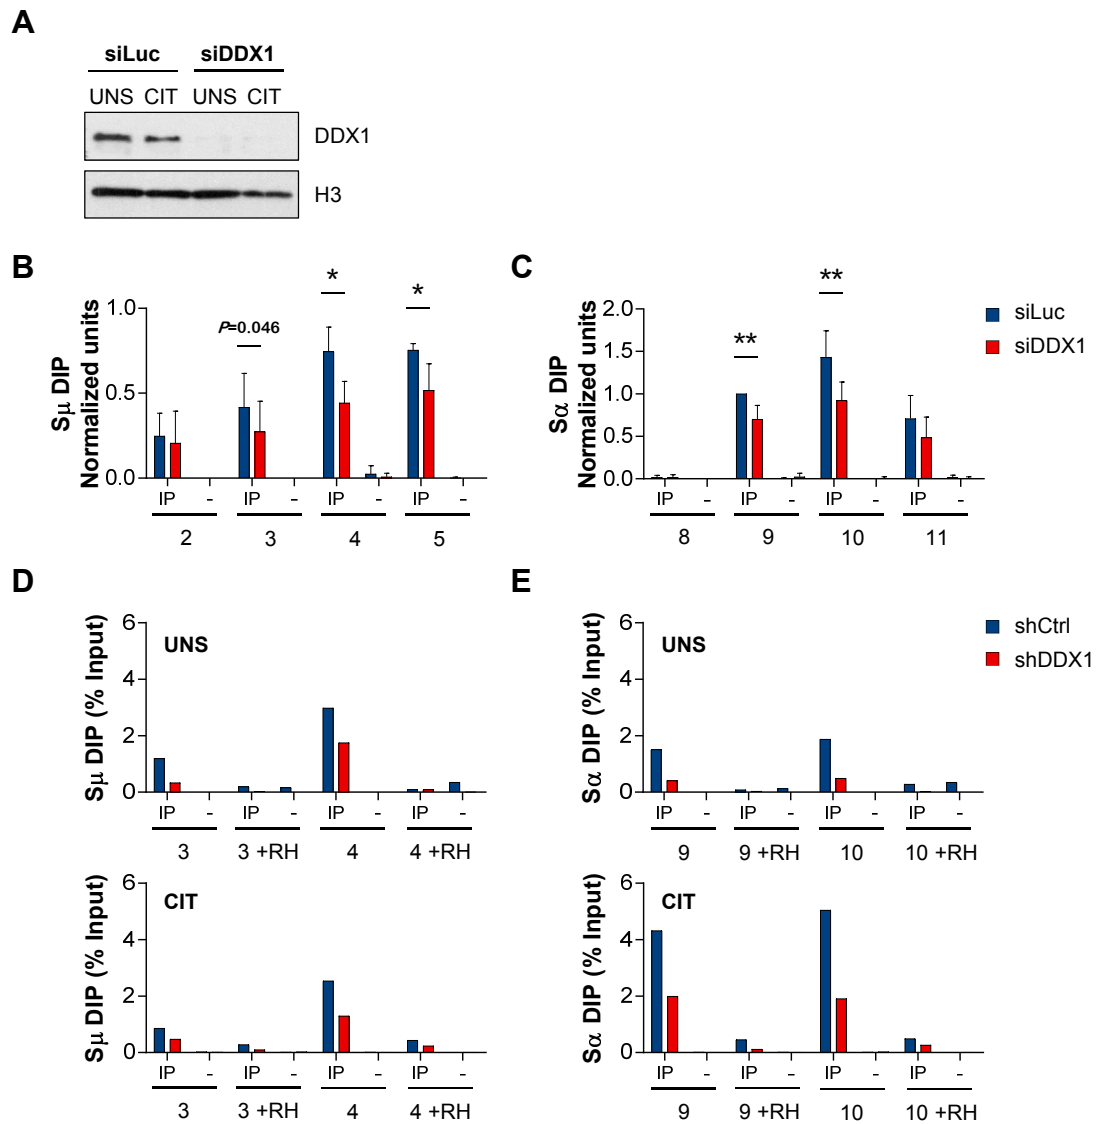

**Figure S3. Related to Figure 3.** (A-C) CH12 cells were transfected with siRNA against Luciferase (siLuc) or mouse DDX1 (siDDX1) and unstimulated (UNS) or CIT stimulated cells analysed after 24 hr. (A) Western blot for DDX1 and Histone H3 loading control. (B-C) DIP analysis of siRNA treated CH12 cells using the S9.6 antibody (IP) or no antibody control (-), after 24 hr in CIT stimulated conditions. DIP signals were measured across S $\mu$  (B) and S $\alpha$  (C) regions and values were normalized to probe 9 in siLuc CIT cells in each experiment (n=5, mean  $\pm$  SD). (D-E) CH12 cells transduced with shCtrl or shDDX1 were cultured in UNS or CIT stimulated conditions for 24 hr. To confirm the specificity of the S9.6 antibody for RNA:DNA hybrids, samples were treated with recombinant RNaseH (RH) before DIP analyses. DIP signals upstream S $\mu$  region, probes 3 and 4 (D) and S $\alpha$  region, probes 9 and 10 (E) were strongly reduced after RH treatment both in shCtrl and shDDX1 samples. The positions of the probes used are indicated in the schematic diagrams on Figure 3B and C.

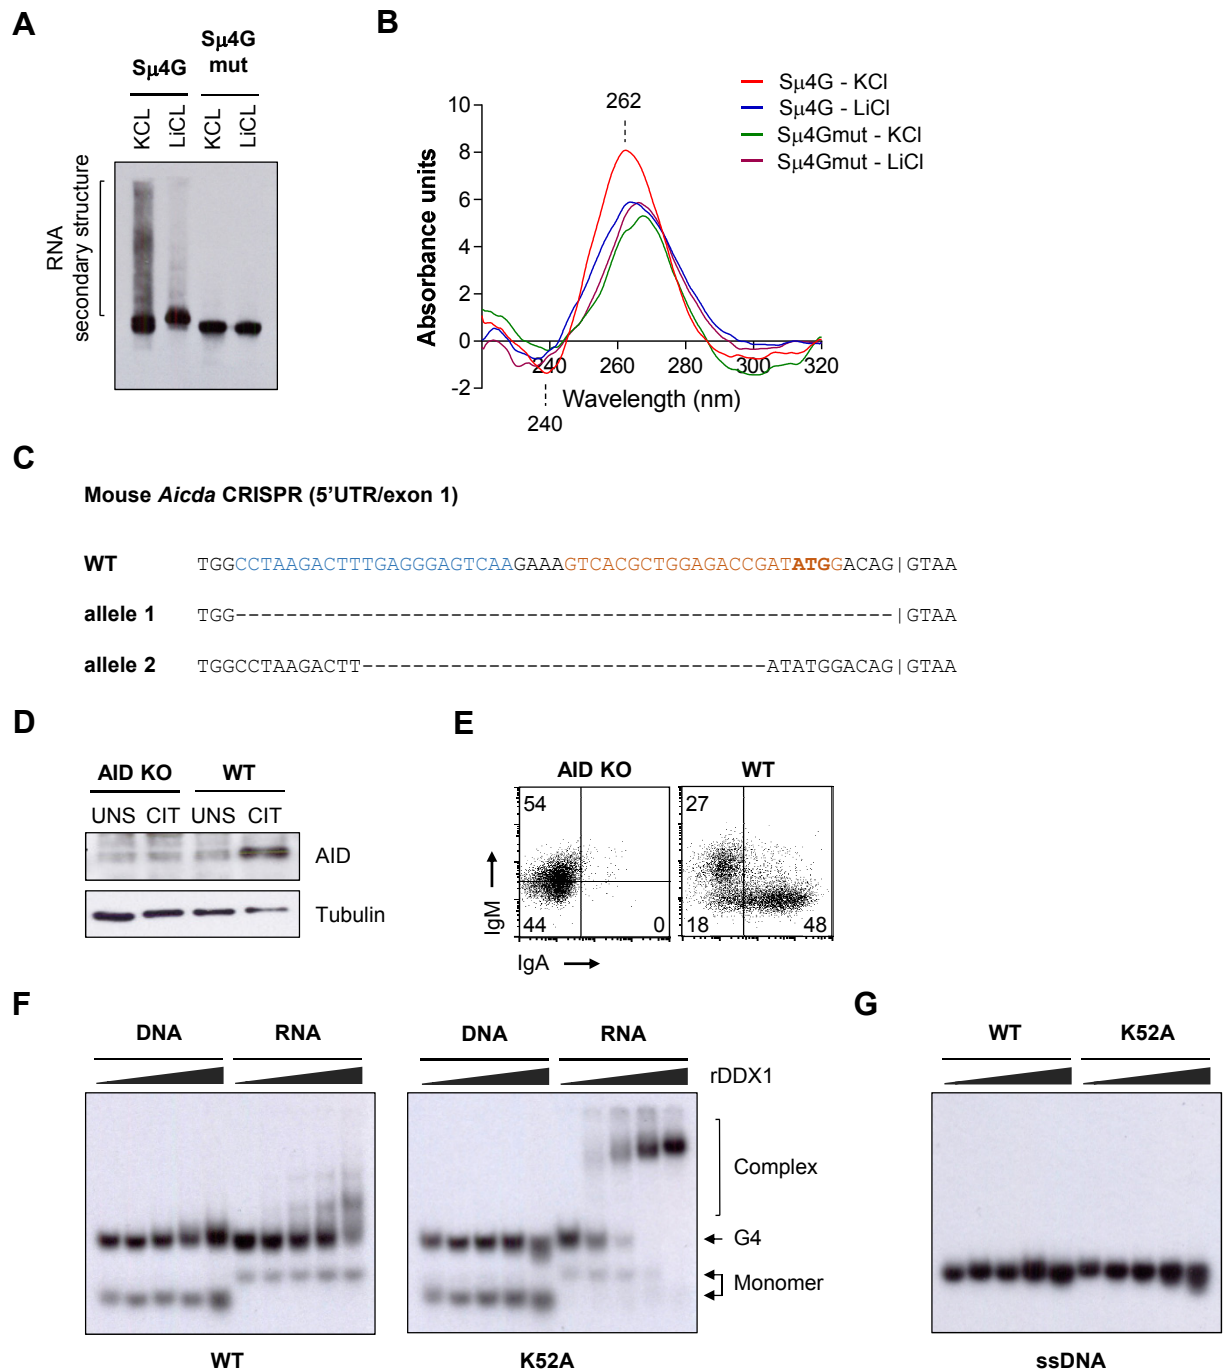

**Figure S4. Related to Figure 4.** (A) Native gel electrophoresis of biotinylated S $\mu$ 4G and S $\mu$ 4Gmut oligonucleotides folded in the presence of either KCl or LiCl. S $\mu$ 4G-KCl migrate as a high molecular weight smear, denoting of higher-order RNA structures. (B) Circular dichroism spectrum of S $\mu$ 4G and S $\mu$ 4Gmut oligonucleotides folded in the presence of either KCl or LiCl. S $\mu$ 4G-KCl oligonucleotides show an absorbance spectrum characteristic of a parallel G4 structure with a positive signal at 262 nm and a negative signal at 240 nm. (C-E) CRISPR/Cas9-mediated targeting of mouse *Aicda* in CH12 cells. (C) Two guide RNAs (sequences highlighted in blue and orange) were targeted to *Aicda* promoter region/exon 1 by Cas9 D10A nickase. Genomic sequence of *Aicda* alleles in AID KO CH12 cell line are depicted below the WT sequence. Allele 1 has a 52 bp deletion which includes exon 1 coding sequences and 5'UTR and allele 2 has a 32 bp deletion in 5'UTR. *Aicda* exon 1-5' splice site is denoted as a vertical bar (|). (D) Western blot for AID and Tubulin loading control, in *Aicda*<sup>-/-</sup> (AID KO) and parental (WT) CH12 cell lines. Note that background antibody signal is observed for WT UNS and AID KO samples. (E) Flow cytometric analysis for surface expression of IgM and IgA. AID KO and WT CH12 cell lines were cultured in CIT stimulated conditions and analysed after 72 hr. Native electrophoretic mobility shift assays (EMSA) using (F) <sup>32</sup>P-labelled tetramolecular G4 RNA or G4 DNA or (G) <sup>32</sup>P-labelled single-stranded DNA and recombinant human DDX1 (rDDX1) proteins (0.125, 0.25, 0.5 or 1  $\mu$ g). Both WT DDX1 (rDDX1) and an ATPase mutant (rDDX1-K52A) were used. Data shown in (F) is representative of 2 independent assays.

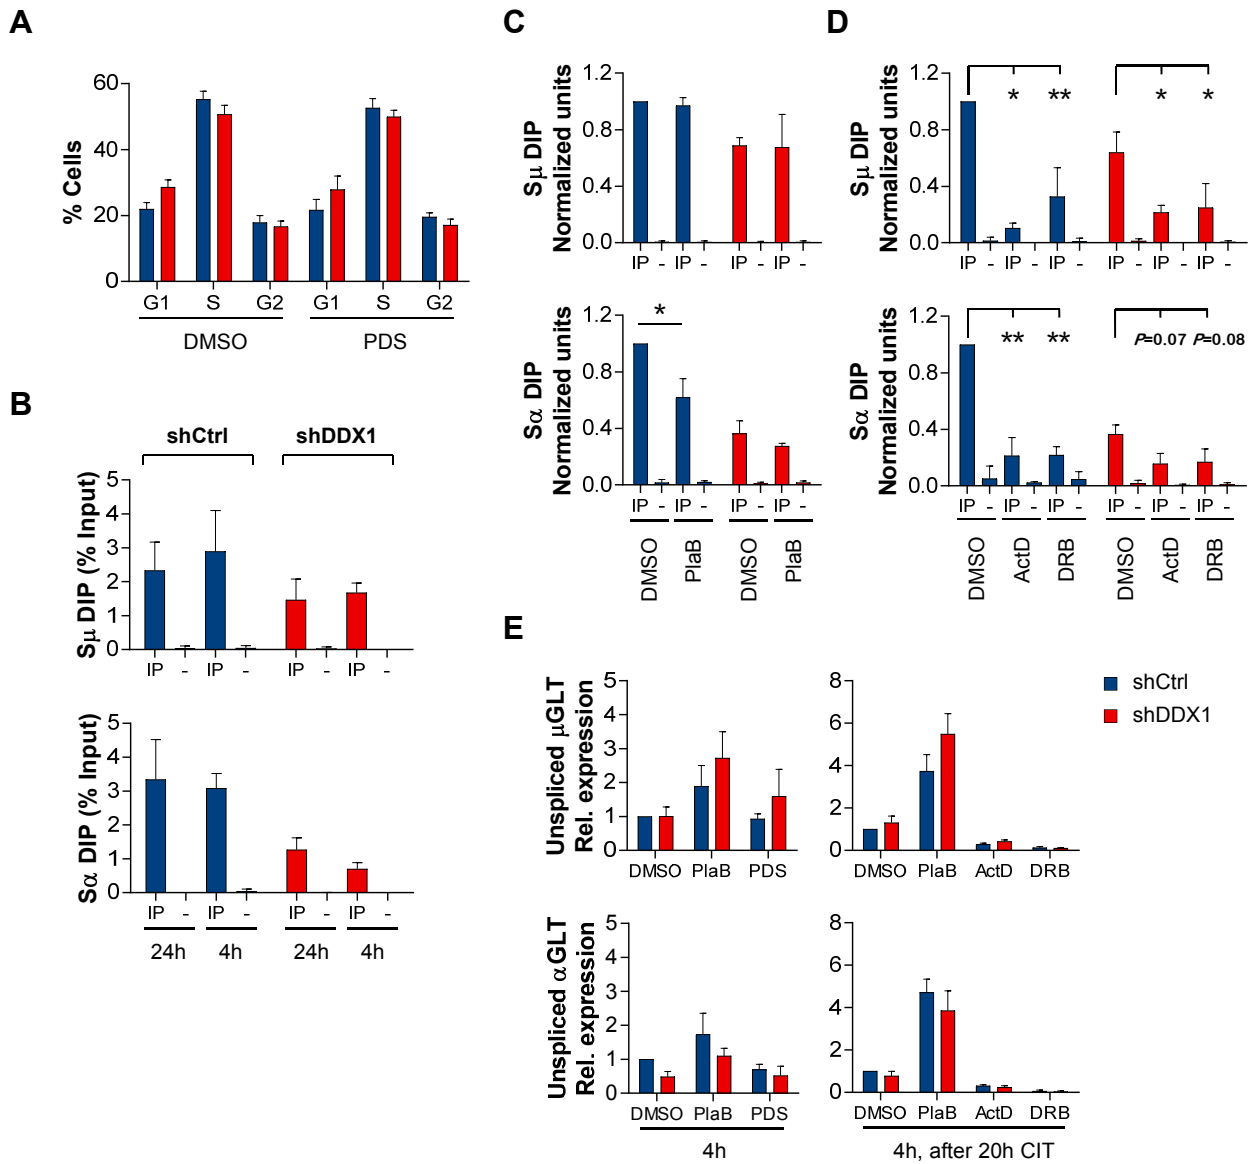

**Figure S5. Related to Figure 5.** (A) Cell cycle analysis of CH12 cells transduced with shCtrl or shDDX1 and cultured under CIT stimulation in the presence of DMSO and pyridostatin (PDS, 10  $\mu$ M) for 4 hr ( $n=3$ , mean  $\pm$  SD). Percentage of cells in different cell-cycle stages was analysed by flow-cytometry using BrdU and PI staining. (B-D) CH12 cells transduced with shCtrl or shDDX1 were analysed by DIP with the S9.6 RNA:DNA hybrid-specific antibody (IP) or no antibody control (-). DIP signals upstream S $\mu$  region (probe 4) and S $\alpha$  region (probe 10) were evaluated (positions of the probes used are indicated in the schematic diagrams on Figure 5). (B) Cells cultured in CIT stimulated conditions for 24 hr or 4 hr. Values are expressed as percentage of Input material ( $n\geq 2$ , mean  $\pm$  SD). (C-D) Cells cultured in CIT stimulated conditions for 20 hr and subsequently with CIT and (C) Pladienolide (PlaB, 1  $\mu$ M) for 4 hr or (D) the transcription inhibitors ActinomycinD (ActD, 5  $\mu$ g/mL) or 5,6-Dichloro-1- $\beta$ -D-ribofuranosylbenzimidazole (DRB, 150  $\mu$ M) for 4 hr. DMSO treated cells were used as a control. Values were normalized to shCtrl DMSO ( $n\geq 2$ , mean  $\pm$  SD). (E) Quantitative PCR analysis of unspliced  $\mu$ GLT and  $\alpha$ GLT expression levels in total RNA from CH12 cells transduced with shCtrl or shDDX1 and treated as indicated. Values were normalized to 18S rRNA and shCtrl DMSO ( $n\geq 3$ , mean  $\pm$  SD).

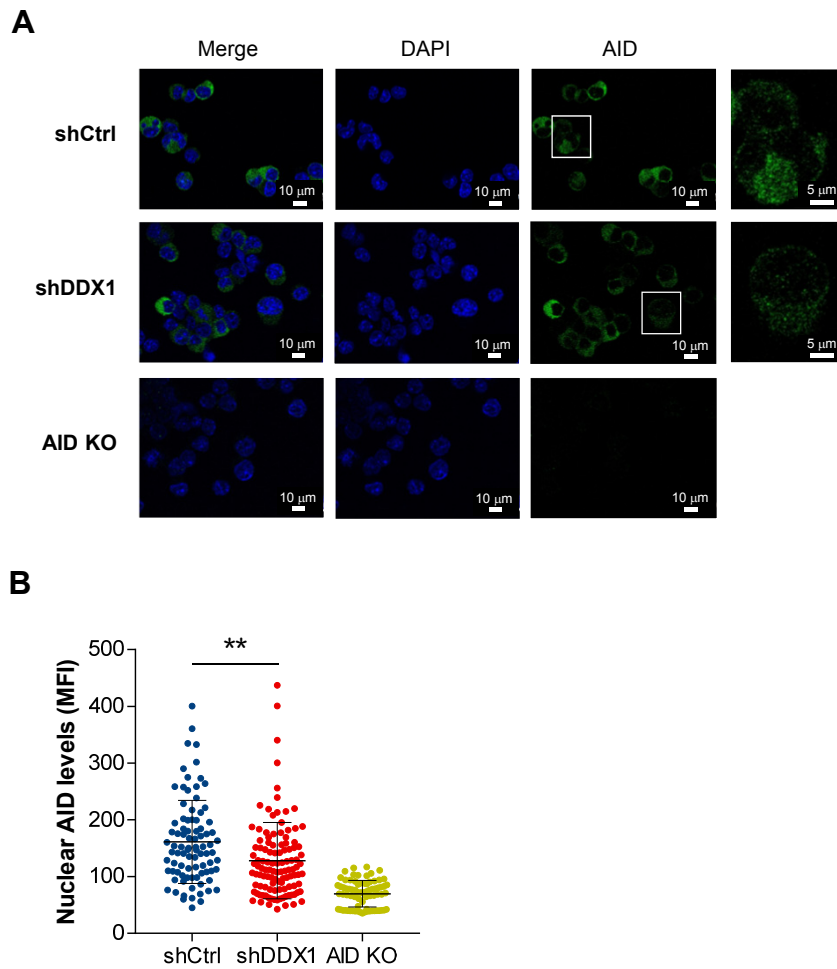

**Figure S6. Related to Figure 6.** (A) Immunofluorescence analysis of DAPI (blue) and AID (green) in CH12 cells transduced with shCtrl or shDDX1 and cultured under CIT stimulation for 24 hr (scale bar, 10  $\mu\text{m}$ ). AID KO CH12 cells were used as a negative control. A larger magnification of AID immunofluorescence is shown on the right to facilitate visualization of nuclear AID signal (scale bar, 5  $\mu\text{m}$ ). (B) Nuclear AID levels were quantified from cells in five different fields and expressed as mean fluorescence intensity (MFI). Each symbol represents individual nuclei (shCtrl, 88 nuclei, shDDX1, 113 nuclei and AID KO, 74 nuclei; mean  $\pm$  SD).



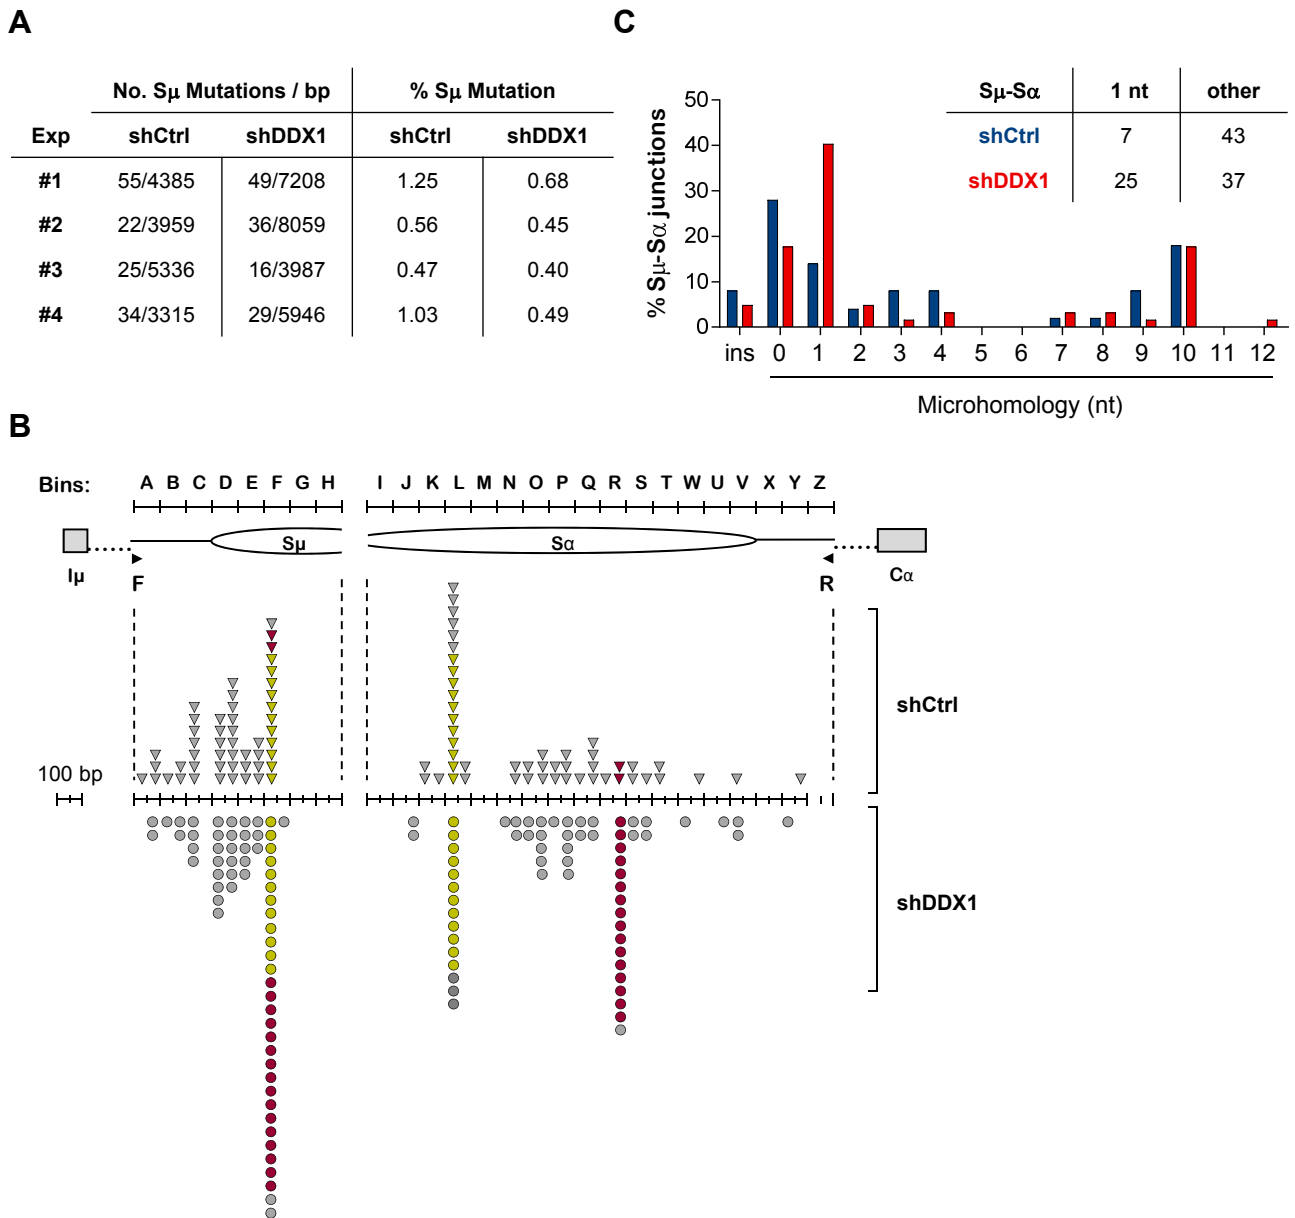

**Figure S7. Related to Figure 6.** Genomic DNA extracted from CH12 cells transduced with shCtrl or shDDX1 and cultured in CIT stimulated conditions for 72 hr was evaluated for: (A) Number of mutations per total number of bp analysed and percentage of mutation in recombined S $\mu$  DNA sequences in each experiment (relative to Figure 6F); (B) Position of S $\mu$  and S $\alpha$  recombination breakpoints relative to PCR primers and grouped in bins of 100 bp (A to Z) to facilitate visualization. Recombination occurs between same coloured triangles for shCtrl or circles for shDDX1 between S $\mu$  and S $\alpha$ , see Table S2 and S3; (C) Percentage of S $\mu$ -S $\alpha$  junctions with nucleotide insertions (ins) or the indicated length of microhomology (MH) measured as the number of consecutive nucleotides (nt) with perfect homology. Table on the top refers to the number of S $\mu$ -S $\alpha$  junctions in shCtrl and shDDX1 cells with 1 nt or other length (ins, 0 or 2-12 nt) of MH. The difference in the number of junctions with 1 nt of MH observed between shCtrl and shDDX1 cells is statistically significant (Fisher's exact test, \*\* $P=0.003$ ).

**Table S2. Related to Figure 6.** S<sub>μ</sub>-S<sub>α</sub> recombination breakpoints in shCtrl CH12 cells. Microhomology at junctions (black) was measured as the number of consecutive nucleotides with perfect homology between germline S<sub>μ</sub> (blue) and S<sub>α</sub> (red). Insertions were defined as nucleotides at the breakpoints with no homology.

|                             |                                                                                              |                               |                                                                                             |                                |                                                                                            |
|-----------------------------|----------------------------------------------------------------------------------------------|-------------------------------|---------------------------------------------------------------------------------------------|--------------------------------|--------------------------------------------------------------------------------------------|
| Exp 2<br>shDDX1_31<br>4 nt  | AGCCTAACTCAGCTGCACCAGCCAGT<br>AGCCTAACTCAGCTCAAGCCAGCTTTG<br>ACTTCATTTTGGCTCAAGCCAGCTTTG     | Exp 1<br>shDDX1_11<br>8 nt    | GCTCATTCCAGCTCAGCCAGCCAGTCT<br>GCTCATTCCAGCTCAGCTCAGCCAGCTC<br>CCCCAGCTTAGCTCAGCTCAGCCAGCTC | Exp 4 ▼<br>shDDX1_4.4<br>10 nt | CAGCTCAGCTCAGCTCAGCCCTAACCCAG<br>CAACTCAGCTCAGCTCAGCCAGCTCAC<br>CAGCTCAGCCAGCTCAGCCAGCTCAC |
| Exp 3<br>shDDX1_1<br>10 nt  | CTATTCCATCTCATTCCAGCTCAGCTCA<br>CTATTCCATCTCATTCCAGTTCAATACA<br>CGGCCAGCTCATTCCAGTTCAATACA   | Exp 3<br>shDDX1_13<br>7 nt    | CTTAGGCCAGCTCAGACAGCACAGTCT<br>CTTAGGCCAGCTCAGTTCAAGCCAGCTC<br>CCCAGCTTAGCTCAGCTCAGCCAGCTC  | Exp 4 ▼<br>shDDX1_8<br>10 nt   | AGCTCAGCTCAGCTCAGCCCTAACCCAGC<br>AACTCAGCTCAGCTCAGCCAGCTCACC<br>AGCTCAGCCAGCTCAGCCAGCTCACC |
| Exp 2<br>shDDX1_2<br>0 nt   | CCCTAAGTCTAGCTCAGCTCAATCCATT<br>CCCTAAGTCTAGCTATTCCAGTTCAATTA<br>AGCGGCCAGCTGATTCCAGTTCAATTA | Exp 2<br>shDDX1_24<br>4 nt    | CAGTCCAGCCTGTCTCATCCAGCTTA<br>CAGTCCAGCCTGTCTCAGCTCAGCCAG<br>CAGCCAGCTTAGCTCAGCTCAGCCAG     | Exp 4 ▼<br>shDDX1_9<br>10 nt   | CTCAGCTCAGCTCAGCCCTAACCCAGCTC<br>CTCAGCTCAGCTCAGCCAGCTCAGCC<br>CTCAGCCAGCTCAGCCAGCTCAGCC   |
| Exp 3<br>shDDX1_10<br>0 nt  | GTCTCATCCAGCTTAGTTTATCTAGT<br>GTCTCATCCACATTCCAGTTCAATACA<br>CGGCCAGCTCATTCCAGTTCAATACA      | Exp 2<br>shDDX1_30<br>0 nt    | CTCAGCTCAGCTCAGCCCTAACCCAGCT<br>CTCAGCTCAGCTCAGCCAGCTCAGCC<br>CTCAGCCAGCTTAGCTCAGCTCAGCC    | Exp 3 ▼<br>shDDX1_9<br>9 nt    | GCTCAGCTCAGCTCAGCTCAGCCCTAAC<br>ACTCAGCTCAGCTCAGCCAGCTCAGCC<br>GCTCAGCCAGCTCAGCCAGCTCAGCC  |
| Exp 1<br>shDDX1_6<br>0 nt   | CCCAGCTAGTCTAGCTCAGCCAGCCC<br>CCCAGCTAGTGTATTGGCTCATGTCTG<br>AAGTTCATTCCAGTTTGGCTCATCTCG     | Exp 2<br>shDDX1_23<br>0 nt    | GCCCAGTCAAGTTCATCCATCTCATCC<br>GCCCAGTCAAGTTCAGCTTAGCTCAG<br>AGCTCAGCTCAGCCAGCTTAGCTCAG     | Exp 3 ▼<br>shDDX1_10<br>9 nt   | GCTCAGCTCAGCTCAGCTCAGCCCTAAC<br>ACTCAGCTCAGCTCAGCCAGCTCAGCC<br>GCTCAGCCAGCTCAGCCAGCTCAGCC  |
| Exp 1<br>shDDX1_5<br>1 nt   | GTTTCAGCCCTAACCTAGCTCAGCCAGC<br>GTTTCAGCCCTAACCTAGCTCATTCAAC<br>TAGGCAGTAGAGTTAGCTCTATTCAAC  | Exp 1<br>shDDX1_7<br>3 nt     | TTTCCAGCCAGTTTCCAGAAAGCCATTCC<br>TTTCCAGCCAGTTTCCAGCCAGCTAGCT<br>CTCAGCTCAGCTCAGCCAGCTTAGCT | Exp 4 ▼<br>shDDX1_11<br>9 nt   | CAGCTCAGCTCAGCTCAGCTCAGCTCA<br>CAGCTCAGCTCAACTCAGCCAGCTCA<br>CAGCTCAGCCAGCTCAGCCAGCTCA     |
| Exp 1<br>shDDX1_27<br>0 nt  | AGCTCAGCTCAGACAACCCGTGTCTAAC<br>AGCTCAGCTCAATTAGCTCTATTCAACC<br>AGGCAGTAGAGTTTAGCTCTATTCAACC | Exp 2<br>shDDX1_21<br>1 nt    | GACAGCACAGCTTGCCTAGGTAGCTC<br>GACAGCACAGCAGCCAGCTTAGCTCA<br>CAGCTCAGCTCAGCCAGCTTAGCTCA      | Exp 3 ▼<br>shDDX1_22<br>1 nt   | TCTAGGTCTGCCCGGTCTAGGTAAGCT<br>TCTAGGTCTGCCGATCAGCCAGCTC<br>CAGCTCAGCCAGCTCAGCCAGCTC       |
| Exp 3<br>shDDX1_16<br>3 nt  | CTCATTCCAGTTCCAGCTCAGCTCAGCT<br>CTCATTCCAGTTCCATCTCAGCTCAGAA<br>CTCAGCCAGCTCATCTCAGCTCAGAA   | Exp 1<br>shDDX1_19<br>0 nt    | GCCCAGTCCAGCCAGCTCAGGCCAT<br>GCCCAGTCCAGCCATCAGCCAAAGTT<br>CCAGCTCAGCTCAGCTCAGCCAGCT        | Exp 4 ▼<br>shDDX1_19<br>ins    | CCGGTCTAGGTAAGCTCAGCCCTTGT<br>CCGGTCTAGGTTAGCTCAGCTCAAC<br>CTCAGCTCAGCCAGCTCAGCCAGCT       |
| Exp 3<br>shDDX1_7<br>2 nt   | AGCCCATTTCCAGCTAGCTTAGCTCAG<br>AGCCCATTTCCAGCTCAGCTCATCTCAGC<br>GCTGAGCTCAGCCAGCTCATCTCAGC   | Exp 1<br>shDDX1_13<br>1 nt    | CTCAGCTCAGCCCTAACCTCAGCTCAGC<br>NTCAGCTNAGCCCTAACAGCCAGCTCA<br>CAGCTCAGCCAGCTCAGCCAGCTCA    |                                |                                                                                            |
| Exp 1<br>shDDX1_25<br>1 nt  | TCAGCTCAGCTCAGCTCAGCTCAGCTC<br>TCAGCTCAGCTCAGTACCCAGGTCAT<br>AGCATAGCTCAGCTCAGCCAGCTCAT      | Exp 2<br>shDDX1_15<br>ins     | CAATCCAGCAAAGCTCAGGCTAGAAT<br>CAATCCAGCAAAGCTCAGTCCAGCTC<br>CAGCTCAGCCAGCTCAGCCAGCTC        |                                |                                                                                            |
| Exp 1<br>shDDX1_2<br>0 nt   | AGCTTAGCTCAGTTTCCAGCTCAGCTCAG<br>AGCTTAGCTCAGTTCAACACAGCAGTAA<br>AGATCAGCTCAGCCCAACACAGCGTAG | Exp 1<br>shDDX1_8<br>2 nt     | TCAGCTCAGCTCAGCCCTAACCCAGCTC<br>TCAGNTCAGNTCAGCCAGATCAGCC<br>TCAGCTCAGCTCAGCCAGCTCAGCC      |                                |                                                                                            |
| Exp 2<br>shDDX1_19<br>1 nt  | CAGCTCAGCTCAGCTCAGCTCAGCTCA<br>CAGCTCAGCTCAGCCAAACACAGCGTAA<br>AGATCAGCTCAGCCCAACACAGCGTAG   | Exp 3<br>shDDX1_3<br>0 nt     | TCAGCTCAGCTCAGCTCAGCCCTAACCC<br>TCAACTCAGCTCATCCCCCAGGTC<br>CAGCTCAGCTCAGCTCAGCCAGCTCA      |                                |                                                                                            |
| Exp 2<br>shDDX1_14<br>4 nt  | AGCCAGACTAACTCAGCTAGCCAGC<br>AGCCAGACTAACTCAGCCCAACACAG<br>CATTTAGATCAGCTCAGCCCAACACAG       | Exp 1<br>shDDX1_1<br>3 nt     | AGCCAGTTCCAGCTCAGCTCATTCCAG<br>AGCCAGTTCCAGCTCAGCTCAGCTCA<br>CAGCTCAGCTCACTCCAGCTCAGCTCA    |                                |                                                                                            |
| Exp 3<br>shDDX1_5<br>3 nt   | CCAGCTCAGTTCCAGCTAACCTAGCT<br>CCAGCTCAGTTCCAGCTCAGCCAGCGG<br>TCAGATCAGCTCAGCCCAACACAGCG      | Exp 3<br>shDDX1_17<br>0 nt    | GTTTATACTAGTTCCAGCTCAACCCAGC<br>GTTTATACTAGTTCCAGCTCAGCTCA<br>AGCCAGCTCAGCCAGCTCAGCTCA      |                                |                                                                                            |
| Exp 2<br>shDDX1_10<br>9 nt  | CACACCAGCCAGCCAGCTTATCCAT<br>CACACCAGCCAGCCAGTTAGTTTAC<br>AGTCTAGCTCAGCCAGCTCAGCTCAC         | Exp 4<br>shDDX1_20<br>0 nt    | GCTCACACCAGCTGAGCCCAACCTATT<br>GCTCACCCAGCTCAGCTCAGTTCACT<br>CCCCAGCTCAGCCAGCTCAGCTCACT     |                                |                                                                                            |
| Exp 1<br>shDDX1_17<br>ins   | CAGCCCATTTCCAGCTAGCTTAGCTCA<br>CAGCCCATTTCCAGCTTAGCTTAGCTCA<br>AGTCTAGCTCAGCCAGCTCAGCTCA     | Exp 1<br>shDDX1_4<br>4 nt     | TCTCCTCTCATTCCAGTTCCAGCTCAGC<br>TCTCCTCTCATTCCAGCTCAGCCAGC<br>CCCAGCTCAGCCAGCTCAGCCAGC      |                                |                                                                                            |
| Exp 4<br>shDDX1_4.5<br>0 nt | AGCTCAGCTCAGCTCAGCTCAGCTCA<br>AGCTCAACTCAGCTCAGCTCAGCCAGT<br>CTCAGCTCAGCTCAGCTCAGCCAGC       | Exp 1 ▼<br>shDDX1_29<br>10 nt | AGCTCAGCTCAGCTCAGCCCTAACCCA<br>AACTCAGCTCAGCTCAGCCAGCTCA<br>AGCTCAGCCAGCTCAGCCAGCTCA        |                                |                                                                                            |
| Exp 3<br>shDDX1_11<br>ins   | GTTTATACTAGTTCCAGCTCAACCCAGC<br>GTTTATACTAGTTCCAGCTCAGCTCAGT<br>TCAGCTCAGCTCAGCCAGCTCAGCTC   | Exp 2 ▼<br>shDDX1_4<br>10 nt  | AGCTCAGCTCAGCTCAGCCCTAACCCA<br>AACTCAGCTCAGCTCAGCCAGCTCA<br>AGCTCAGCCAGCTCAGCCAGCTCA        |                                |                                                                                            |
| Exp 3<br>shDDX1_23<br>0 nt  | CCTGTCTCATCCAGCTTAGTTTATCC<br>CCTGTCTCATCCAGCTTAGTTTATCC<br>AGCCAGCTCAGCTCAGCCAGCTCAG        | Exp 2 ▼<br>shDDX1_5<br>10 nt  | CTCAGCTCAGCTCAGCCCTAACCCAGC<br>CTCAGCTCAGCTCAGCCAGCTCAGCC<br>CTCAGCCAGCTCAGCCAGCTCAGCC      |                                |                                                                                            |
| Exp 3<br>shDDX1_21<br>0 nt  | CTCATTCCAGTACAGCTCAGCCAGACA<br>CTCATTCCAGTACAGCTCAGCCCTAAC<br>GCTCAGCCAGCTCAGCTCAGCCCTAAC    | Exp 2 ▼<br>shDDX1_9<br>10 nt  | GCTCAGCTCAGCTCAGCCCTAACCCAG<br>ANTCAGCTCAGNTCAGCCAGCTCAGC<br>CTTACAGCCAGCTCAGCCAGCTCAGC     |                                |                                                                                            |
| Exp 3<br>shDDX1_15<br>1 nt  | AGCTCATTCCAGCTCAGCCAGCCCTAAC<br>AGCTCATTCCAGCTCAGCCAGTTAGCT<br>CTTAGCTCAGCTCAGCCAGCTCAGCT    | Exp 3 ▼<br>shDDX1_2<br>10 nt  | AGCTCAGCTCAGCTCAGCCCTAACCCA<br>AACTCAGCTCAGCTCAGCCAGCTCA<br>AGCTCAGCCAGCTCAGCCAGCTCA        |                                |                                                                                            |

**Table S3. Related to Figure 6.**  $S_{\mu}$ - $S_{\alpha}$  recombination breakpoints in shDDX1 CH12 cells. Microhomology at junctions (black) was measured as the number of consecutive nucleotides with perfect homology between germline  $S_{\mu}$  (blue) and  $S_{alpha}$  (red). Insertions were defined as nucleotides at the breakpoints with no homology.

|                              |                                                                                               |                             |                                                                                             |                             |                                                                                             |
|------------------------------|-----------------------------------------------------------------------------------------------|-----------------------------|---------------------------------------------------------------------------------------------|-----------------------------|---------------------------------------------------------------------------------------------|
| Exp 4<br>shDDX1_5.1<br>0 nt  | TCATTCCAGCTCAGCTCAGCCTAACTCA<br>TCATTCCAGCTCAACTTCATTTTGGCTCA<br>TTCATTACAGCTACTTCATTTTGGCTCA | Exp 2<br>shDDX1_20<br>1 nt  | CATCTTAGGCCAGCTCAGACAGCACAGC<br>CATCTTAGGCCAGCTAGCTCAGCTCACC<br>AGCTCAGCCAGCTTAGCTCAGCTCACC | Exp 1<br>shDDX1_13<br>10 nt | CTCAGCTCAGCTCAGCTCAGCCTAACCC<br>CTCAANTCAGNTCAGNTCAGCCAGCTC<br>CCCAGCTCAGCCAGCTCAGCCAGCTC   |
| Exp 3<br>shDDX1_23<br>1 nt   | GCCTATTCCAGTCTAGTTTCAGCCATC<br>GCCTATTCCAGTTACAGTCTACTTCATT<br>ATTCCAGTTTCATTACAGTCTACTTCATT  | Exp 1<br>shDDX1_28<br>4 nt  | CCTAGTCTAGCTCAGCCAGCCCTTCCAG<br>CCTAGTCTAGCTCAGCTTAGCTCAGCTC<br>CTCAGCTCAGCCAGCTTAGCTCAGCTC | Exp 2<br>shDDX1_10<br>10 nt | AGCTCAGCTCAGCTCAGCCTAACCCAGC<br>AACTCAGCTCAGCTCAGCCAGCTCACC<br>AGCTCAGCCAGCTCAGCCAGCTCAGC   |
| Exp 2<br>shDDX1_62<br>ins    | ATCCTAGTCCATCCCAGCTTAGCCAGT<br>ATCCTAGTCCAGTGTAGGCAGTAATGAA<br>TTTAGCTCTATTCACCTAGATTAATGAA   | Exp 1<br>shDDX1_6<br>0 nt   | TTTCAGCCTAGCTTAGCTCAGTTAGCG<br>TTTCAGCCTAGCTTAGCTCAGCTAGTC<br>CCAGCTCAGCCAGCTCAGCTCAGCTC    | Exp 4<br>shDDX1_7.2<br>2 nt | GCCCCGTCTAGGTAAGCTCAGCCTTGTT<br>GCCCCGTCTAACTCAGCTCAGCTCAACT<br>CCCCAGCTCAGCCAGCTCAGCCAGCTC |
| Exp 3<br>shDDX1_18<br>0 nt   | CTCAGCCTAACTCAGCTCGACCAGCC<br>CTCAGCCTAACTCAATTCACCTAGATT<br>TAGAGTTTAGCTCTATTCACCTAGATT      | Exp 2<br>shDDX1_88<br>0 nt  | CAGCTCAGACAGCACAGCTTGCCTAGG<br>CAGCTCAGACTCAGCCAGCTTAGCCCA<br>CTCAGCCAGCTCAGCCAGCTCAGCCCA   | Exp 1<br>shDDX1_4<br>0 nt   | TCCCAGCTTAGTTTATCTAGTCCATCC<br>TCCCAGCTTAGTTGTTCACTCAGCTCA<br>CAGCCAGCTCAGCCAGCTCAGCCCA     |
| Exp 3<br>shDDX1_6<br>ins     | TAGCTCAGCCTTGTTCAGCCATCCCA<br>TCAGCTCAGCTCAACTCAGAAATTTAACT<br>GTCCAGGTAGGCAGTAGAGTTTAGCT     | Exp 2<br>shDDX1_75<br>ins   | AGTCTCTCTCTCTCTCTCTCTCTCT<br>AGTCTCTNTCCAGCTCAGCTCAGCCCC<br>CTCAGCCAGCTCAGCCAGCTCAGCC       | Exp 1<br>shDDX1_14<br>1 nt  | CTGCCCCGTCTAGGTAAGCTCAGCCTT<br>CTGCCCCGTCTAACTCAGCTCAGCTCA<br>CAGCTCAGCTCAGCCAGCTCAGCCCA    |
| Exp 3<br>shDDX1_13<br>2 nt   | CCTAGTCCATCCCAGCTTAGCCAGTTC<br>CCTAGTCCATCCATAGATGAGCTCACC<br>ACACAGCGTAGCATAGCTGAGCTCACC     | Exp 2<br>shDDX1_64<br>8 nt  | CATCCTAGTTCAGCTCAGTTAGCCCAT<br>CATCCTAGTTCAGCTCAGCCAGCTCAG<br>AGCTCAGCTCAGCTCAGCCAGCTCAG    | Exp 1<br>shDDX1_26<br>1 nt  | CTGCCCCGTCTAGGTAAGCTCAGCCTT<br>CTGCCCCGTCTAACTCAGCTCAGCTCA<br>CAGCTCAGCTCAGCCAGCTCAGCCCA    |
| Exp 1<br>shDDX1_29<br>1 nt   | AGTGTAGCCTAGCTTGTCCAGCTCTGC<br>AGTGTAGCCTAGCCCAACACAGCGTAT<br>CAGATCAGCTCAGCCCAACACAGCGTAG    | Exp 3<br>shDDX1_2<br>7 nt   | GCTCAACCCAGCTCATTCCAGCTCAGC<br>GCTCAACCCAGCTCAGCCAGCTCAGC<br>GCTCAGCTCAGCTCAGCCAGCTCAGC     | Exp 1<br>shDDX1_27<br>1 nt  | CTGCCCCGTCTAGGTAAGCTCAGCCTT<br>CTGCCCCGTCTAACTCAGCTCAGCTCA<br>CAGCTCAGCTCAGCCAGCTCAGCCCA    |
| Exp 2<br>shDDX1_70<br>7 nt   | TCTTAGGCCAGCTCAGACAGCAGCAGCT<br>TCTTAGGCCAGCTCAGCCCAACACAGC<br>TTTCAGATCAGCTCAGCCCAACACAGC    | Exp 2<br>shDDX1_6<br>0 nt   | AGTACAGCCTAGCCAGACAGTGCAGT<br>AGTACAGCCTAGCCATCTCAGTTTA<br>CAGCTCAGCCAGCTCATCCAGCTTA        | Exp 1<br>shDDX1_31<br>1 nt  | CGGTCTAGGTAAGCTCAGCCTTGTTT<br>CGGTCTAACTCAACTCAGCTCAACTC<br>CAGCTCAGCCAGCTCAGCCAGCTC        |
| Exp 2<br>shDDX1_8<br>3 nt    | ATCCTAGTCCATCCCAGCTTAGCCAG<br>ATCCTAGTCCATCAGCTCAACCCAAACA<br>TCTCATTTAGATCAGCTCAGCCCAACA     | Exp 3<br>shDDX1_11<br>0 nt  | AGCCTAGCTCAGCTCAGCCAGCCAGC<br>AGCCTAGCTCAGCTCAGCTCAGCTCACC<br>GCTCACTCCAGCTCAGCTCAGCTCACC   | Exp 2<br>shDDX1_46<br>1 nt  | TCTGCCCCGTCTAGGTAAGCTCAGCCT<br>TCTGCCCCGTCTAACTCAGCTCAGCTC<br>CCAGCTCAGCTCAGCCAGCTCAGCC     |
| Exp 2<br>shDDX1_59<br>1 nt   | GCCCATCCCAGCTCATTCCAGCTCAGC<br>GCCCATCCCAGCTTTCAGCTCAGCCCA<br>TAGCTCAGCCAGCTCAGCTCAGCCCA      | Exp 4<br>shDDX1_7.1<br>0 nt | TAACTCAGCCTAGCCAGACTAACTC<br>TAACTCAGCCTAGTTCAGCCAGCTCA<br>AGCTCAGCCAGCTCAGCCAGCTCA         | Exp 2<br>shDDX1_17<br>1 nt  | TCTGCCCCGTCTAGGTAAGCTCAGCCTT<br>TCTGCCCCGTCTAACTCAGCTCAGCTCA<br>CAGCTCAGCTCAGCCAGCTCAGCCCA  |
| Exp 2<br>shDDX1_13<br>2 nt   | GCTCAACCCAGCTCATTCCAGCTCAGC<br>GCTCAACCCAGCTAGTTTCAGCCAGTT<br>CTCAGCTCAGCTCAGCTCAGCCAGCT      | Exp 2<br>shDDX1_7<br>0 nt   | CTTTGTCCAGCTCTGCTCAGCCATTT<br>CTTTGTCCAGCTCTGCTCAGCCAG<br>GCCAGCTCAGCCAGCTCAGCCAG           | Exp 3<br>shDDX1_10<br>1 nt  | GGTCTGCCCCGTCTAGGTAAGCTCAGC<br>GGTCTGCCCCGTCTAACTCAGCTCAGC<br>CCCCAGCTCAGCTCAGCCAGCTCAGC    |
| Exp 3<br>shDDX1_4<br>12 nt   | CTCAGCTCAGCTCAGCTCAGCTCAGCT<br>CTCAGCTCAGTTAGCTCAGCTCAGCT<br>CTCAGCCAGCTCAGCTCAGCTCAGCT       | Exp 3<br>shDDX1_4<br>10 nt  | CTCAGCTCAGCTCAGCCTAACCCAGCT<br>CTCAGCTCAGCTCAGCCAGCTCAGCC<br>CTCAGCCAGCTCAGCCAGCTCAGCC      | Exp 4<br>shDDX1_1.2<br>1 nt | TCTGCCCCGTCTAGGTAAGCTCAGCCTT<br>TCTGCCCCGTCTAACTCAGCTCAGCTCA<br>CCAGCTCAGCTCAGCCAGCTCAGCCCA |
| Exp 1<br>shDDX1_1<br>1 nt    | TCACACCAGCCAGCCAGCCTATTCCA<br>TCACACCAGCCAGCTCAGCTCAGCTAGC<br>GCTCACCTAGCTCAGCTCAGCTAGC       | Exp 1<br>shDDX1_11<br>10 nt | GCTCAGCTCAGCTCAGCCTAACCCAGC<br>ACTCAGNTCAGNTCAGCCAACTCACC<br>GCTCAGCCAGCTCAGCCAGCTCACC      | Exp 4<br>shDDX1_2.1<br>1 nt | TGCCCCGTCTAGGTAAGCTCAGCCTTG<br>TGCCCCGTCTAACTCAGCTCAGCTCAAC<br>AGCTCAGCTCAGCCAGCTCAGCCAG    |
| Exp 1<br>shDDX1_16<br>0 nt   | GCTCAGCTCAGCCTAACCCAGCTCACA<br>GNTCAGCCAGCTAGCTCAGTNNANN<br>GCTCACCTAGCTCAGCTCAGCTAGC         | Exp 1<br>shDDX1_36<br>10 nt | AGCTCAGCTCAGCTCAGCCTAACCCAG<br>AACTCAGCTCAGCTCAGCCAGCTCAC<br>AGCTCAGCCAGCTCAGCCAGCTCAC      | Exp 4<br>shDDX1_2.2<br>1 nt | TGCCCCGTCTAGGTAAGCTCAGCCTTG<br>TGCCCCGTCTAACTCAGCTCAGCTCAAC<br>AGCTCAGCTCAGCCAGCTCAGCCAG    |
| Exp 2<br>shDDX1_19.1<br>1 nt | GTTTCATCCATCTCATCCATCCATCC<br>GTTTCATCCATCTCAGTTAGCTCAGCTC<br>GCTCAGCTCAGCCAGCTCAGCTCAGCT     | Exp 2<br>shDDX1_40<br>10 nt | CAGCTCAGCTCAGCTCAGCCTAACCCA<br>CAACTCAGCTCAGCTCAGCCAGCTCA<br>CAGCTCAGCCAGCTCAGCCAGCTCA      | Exp 4<br>shDDX1_5.2<br>1 nt | CCGGTCTAGGTAAGCTCAGCCTTGTTCA<br>CCGGTCTAACTCAGCTCAGCTCAACTCA<br>TCAGCTCAGCCAGCTCAGCCAGCTCA  |
| Exp 1<br>shDDX1_3<br>8 nt    | CCAGCCTAGTCTAGCTCAGCCAGCCCT<br>CCAGCCTAGTCTAGTTAGCTCAGCCCT<br>CTCAGCTCAGCCAGCTCAGCTCAGCCCT    | Exp 2<br>shDDX1_51<br>10 nt | GCTCAGCTCAGCTCAGCCTAACCCAGC<br>ACTCAGCTCAGCTCAGCCAGCTCACC<br>GCTCAGCCAGCTCAGCCAGCTCACC      | Exp 4<br>shDDX1_10<br>1 nt  | AGGTCTGCCCCGTCTAGGTAAGCTCAG<br>AGGTCTGCCCCGTCTAACTCAGCTCAG<br>CTCAGCTCAGCTCAGCCAGCTCAG      |
| Exp 4<br>shDDX1_3<br>1 nt    | ATCCCATCCATCCCATCCATCCCAT<br>ATCCCATCCCTCAGCCAGTTTACGCTC<br>CCAGCTCAGCTCAGCCAGCTCAGCTC        | Exp 2<br>shDDX1_3<br>10 nt  | TCAGCTCAGCTCAGCTCAGCCTAACCC<br>TCAACTCAGCTCAGCTCAGCCAGCTC<br>CCAGCTCAGCCAGCTCAGCCAGCTC      | Exp 4<br>shDDX1_17<br>1 nt  | AGGTCTGCCCCGTCTAGGTAAGCTCAG<br>AGGTCTGCCCCGTCTAACTCAGCTCAG<br>ACCCAGCTCAGCTCAGCCAGCTCAG     |
| Exp 2<br>shDDX1_19.2<br>1 nt | TTAGCTCAGTTTAGCCAGCTCAGCCT<br>TTAACTCAGTTTCCCAGCTCAGCTCA<br>TTAGCTCAGCTCAGCCAGCTCAGCTCA       | Exp 2<br>shDDX1_1<br>10 nt  | GCTCAGCTCAGCTCAGCCTAACCCAGC<br>ACTCAGCTCAGCTCAGCCAGCTCACC<br>GCTCAGCCAGCTCAGCCAGCTCACC      | Exp 4<br>shDDX1_16<br>1 nt  | CCCCGTCTAGGTAAGCTCAGCCTTGTT<br>CCCCGTCTAACTCAGCTCAGCTCAACT<br>CTCAGCTCAGCCAGCTCAGCCAGCT     |
| Exp 3<br>shDDX1_7<br>1 nt    | ATCCTAGTCCATCCCAGCTTAGCCAG<br>ATCCTAGTTCAGCTCAGCCAGCTCAGCTC<br>CTTAGCTCAGCTCAGCCAGCTCAGCTC    | Exp 3<br>shDDX1_8<br>10 nt  | GCTCAGCTCAGCTCAGCCTAACCCAGC<br>ACTCAGCTCAGCTCAGCCAGCTCACC<br>GCTCAGCCAGCTCAGCCAGCTCACC      | Exp 4<br>shDDX1_4<br>1 nt   | GCTGCCCCGTCTAGGTAAGCTCAGCC<br>GCTGCCCCGTCTAACTCAGCTCAGCTC<br>CCAGCTCAGCTCAGCCAGCTCAGCC      |
| Exp 3<br>shDDX1_20<br>4 nt   | GACAGCACAGCTTGCCTAGGTCAGCTC<br>CAGAGCACAGCTCAGCTCAGCCAGTTC<br>CCCAGCTTAGCTCAGCTCAGCCAGCTC     | Exp 3<br>shDDX1_14<br>10 nt | GCTCAGCTCAGCTCAGCCTAACCCAGC<br>ACTCAGCTCAGCTCAGCCAGCTCACC<br>GCTCAGCCAGCTCAGCCAGCTCACC      | Exp 1<br>shDDX1_23<br>1 nt  | CCCAGGCTAGCTCACTGTCAAGTTTGG<br>CCCAGGCTAGCTCACCCAGNTCAGCTC<br>TCAGCTCAGCTCAGCCAGCTCAGCTC    |
| Exp 2<br>shDDX1_2<br>0 nt    | TGCTCAGCCATTTTTCAGCTTAGCTTAGC<br>TGCTCAGCCATTTTTCAGCTCAGCTCAGC<br>GCTCAGCCAGCTTAGCTCAGCTCAGCC | Exp 4<br>shDDX1_1.1<br>9 nt | AGCTCAGCTCAGCTCAGCTCAGCCTAA<br>AACTCAGCTCAGCTCAGCCAGCTCAC<br>AGCTCAGCCAGCTCAGCCAGCTCAC      |                             |                                                                                             |

**Table S4.** Primer sequences. Related to STAR Methods.

| <b>qPCR Gene-specific primers</b>                              |         | <b>Sequence</b>                |
|----------------------------------------------------------------|---------|--------------------------------|
| unspliced $\beta$ -actin                                       | forward | AGACTCCCAGCACACTGAACTTAG       |
|                                                                | reverse | CAGAAGAAAGACAATTGAGAAAGGG      |
| spliced $\beta$ -actin                                         | forward | TGCGTGACATCAAAGAGAAG           |
|                                                                | reverse | CGGATGTCAACGTCACACTT           |
| unspliced $\mu$ GLT                                            | forward | CTCTGGCCCTGCTTATTGTTG          |
|                                                                | reverse | ATTGGTTAACAGGCAACATTTTTCTTTTAC |
| unspliced $\alpha$ GLT                                         | forward | GATTTAAGCAGGCCTGGGGTG          |
|                                                                | reverse | CTAGTTCAGGCCACTCCATG           |
| spliced $\mu$ GLT                                              | forward | CTCTGGCCCTGCTTATTGTTG          |
|                                                                | reverse | AATGGTGCTGGGCAGGAAGT           |
| spliced $\alpha$ GLT                                           | forward | CCAGGCATGGTTGAGATAGAGATAG      |
|                                                                | reverse | GAGCTGGTGGGAGTGTCAAGT          |
| <b>DIP/ChIP primers</b>                                        |         | <b>Sequence</b>                |
| CH12 VDJ promoter (probe 1)                                    | forward | AGCCTACATGCAGCTCAGCA           |
|                                                                | reverse | CAGTAGTCAAAGTAGTACCCCCAGC      |
| 3'JH4 (probe 2)                                                | forward | CATCCAGGGACTCCACCAAC           |
|                                                                | reverse | AGAATGGCCTCTCCAGGTCT           |
| I $\mu$ Ex (probe 3)                                           | forward | AAGGGCTTCTAAGCCAGTCC           |
|                                                                | reverse | CACAACCATACATTCCCAGGT          |
| S $\mu$ (probe 4)                                              | forward | GCTAAACTGAGGTGATTACTCTGAGGTAAG |
|                                                                | reverse | GTTTAGCTTAGCGGCCAGCTCATTCCAGT  |
| DownS $\mu$ (probe 5)                                          | forward | GCTGACATGGATTATGTGAGG          |
|                                                                | reverse | CCTACACCAGATCATCCAGTACAGCT     |
| C $\mu$ _secpA (probe 6)                                       | forward | AGCTGGAGGAATCGCATGTT           |
|                                                                | reverse | ACACCCTGCATACTTGCCTC           |
| IgM +1Kb (probe 7)                                             | forward | CCAGCATCCCAGGGTAACAA           |
|                                                                | reverse | TCTAGTGGGTAGCTGCAGGA           |
| I $\alpha$ Ex -0.5Kb (probe 8)                                 | forward | CTGACCACATGGGCCTTGAT           |
|                                                                | reverse | CTGTTGCTCTGGCTCCTTGA           |
| I $\alpha$ Ex (probe 9)                                        | forward | GTGATTCAGGGAGCAAGAGC           |
|                                                                | reverse | TCTAGCCTGGGAGTCTCCTG           |
| UpS $\alpha$ (probe 10)                                        | forward | GGGCTAGGCTGAGCAAATCTA          |
|                                                                | reverse | CCCGCCCAATCTAACCTAGC           |
| DownS $\alpha$ (probe 11)                                      | forward | TGAAAAGACTTTGGATGAAATGTGAACCAA |
|                                                                | reverse | GATACTAGGTTGCATGGCTCCATTACACA  |
| C $\alpha$ _secpA (probe 12)                                   | forward | CGTGGCATCTTCTTCCCAGT           |
|                                                                | reverse | AAGGGTAGCACCATCAAGGC           |
| IgA +1Kb (probe 13)                                            | forward | TCAGGCCTTAGTGACGAGGA           |
|                                                                | reverse | TCTACTGCGGCACCTACAAC           |
| <b>Human DDX1 primers</b>                                      |         | <b>Sequence</b>                |
| hDDX1 cDNA                                                     | forward | CGGAGGACGGGGTGAAGAT            |
|                                                                | reverse | AAGAAGTTCTGAACAGCTGGTTAG       |
| <b>S<math>\mu</math>-S<math>\alpha</math> junction primers</b> |         | <b>Sequence</b>                |
| UpS $\mu$                                                      | forward | CGCTAAACTGAGGTGATTACTCTG       |
| DownS $\alpha$                                                 | reverse | GATACTAGGTTGCATGGCTCCATTACACA  |
| <b>Genotyping primers</b>                                      |         | <b>Sequence</b>                |
| DDX1 wild-type/loxP alleles                                    | forward | AGTTCATGCAGGCTTCCTCC           |
|                                                                | reverse | CCTTCCTGTTGGTCTTTCAGAGT        |
| DDX1 deleted allele                                            | forward | AGTTCATGCAGGCTTCCTCC           |
|                                                                | reverse | GAACTGATGGCGAGCTCAGA           |
| Aicda-Cre                                                      | forward | CGTTTTCTGAGCATACTGGA           |
|                                                                | reverse | ATTCTCCCACCGTCAGTACG           |
